# Supplementary material
Source: PubMed Central journal article supplement (PMC1173143)
Supplement: 7600702s7.pdf [file 7600702s7.pdf]

| <b>GO Biological process</b>            | <b>GO Cell. component</b> | <b>Total no. of peptides</b> | <b><u>Remarks</u></b>                                                                    |
|-----------------------------------------|---------------------------|------------------------------|------------------------------------------------------------------------------------------|
| chromatin modeling/modification         | nucleus                   | 289                          | ATPase-dependent chromatin remodeling, HDACs                                             |
| transcriptional regulation              |                           |                              |                                                                                          |
| Unknown                                 |                           | 158                          | putative transcription factors, RNA binding proteins, nucleolar proteins, receptors etc. |
| mRNA processing                         | nucleus                   | 139                          | splicing factors                                                                         |
| DNA topological change                  | nucleus                   | 130                          | topoisomerases                                                                           |
| transcription regulation, DNA dependent | nucleus                   | 105                          | Transcription factors                                                                    |
| Metabolism                              | mitochondrion             | 54                           | carboxylases                                                                             |
| protein biosynthesis                    | cytosol                   | 53                           | ribosomal proteins                                                                       |
| ribosome biogenesis                     | nucleolus                 | 37                           | apoptotic chromatin condensation inducer in the nucleus                                  |
| DNA repair                              | nucleus                   | 28                           | XRCC1, Ku autoantigen                                                                    |
| nucleolus biogenesis                    | nucleus                   | 24                           |                                                                                          |
| cell proliferation                      | nucleus                   | 23                           | Ki-67                                                                                    |
| DNA replication                         | nucleus                   | 23                           | ORC                                                                                      |
| chromatin assembly                      | nucleus                   | 21                           | histones                                                                                 |
| Cytoskeleton                            |                           | 18                           | tubulin                                                                                  |
| structural molecule                     | nucleus                   | 11                           | NuMA1                                                                                    |
| protein targeting                       | nucleus                   | 7                            |                                                                                          |
| Apoptosis                               | nucleus                   | 4                            | CDC5                                                                                     |
| protein chaperone                       | nucleus                   | 4                            |                                                                                          |
| cell cycle                              | nucleus                   | 3                            | RCC1                                                                                     |
| signal transduction                     |                           | 2                            | GTP binding protein 3                                                                    |
| <b>Total # of peptides:</b>             |                           | <b>&gt;1100</b>              |                                                                                          |
| <b>Gel slices:</b>                      |                           | <b>~45</b>                   |                                                                                          |
| <b>MW range:</b>                        |                           | <b>15-324kDa</b>             |                                                                                          |

**Supplementary Table I:** Classification by Gene Ontology (GO) criteria of proteins identified by mass spectrometry as co-purifying with GATA-1
